# Supplementary material for: Ketamine alleviating depressive-like behaviors is associated with regulation of nNOS–CAPON–Dexras1 complex in chronic unpredictable mild stress rats
Source: PubMed Central journal article supplement (PMC9508647; doi:10.1515/tnsci-2022-0245), 2022-09-21
Supplement: tnsci-2022-0245-sm.pdf [file tnsci-2022-0245-sm.pdf]

## Supplementary material

**Table S1:** Levels of nNOS, CAPON and Dexas1 expression in the prefrontal cortex by Immunohistochemistry and immunofluorescence ( $n = 12$ )

| Groups | nNOS                                    | CAPON                                   | Dexas1                                  |
|--------|-----------------------------------------|-----------------------------------------|-----------------------------------------|
| C      | $0.79 \pm 0.02$                         | $0.10 \pm 0.03$                         | $0.25 \pm 0.02$                         |
| CK     | $0.65 \pm 0.03^{\#}$                    | $0.17 \pm 0.04^{\#}$                    | $0.31 \pm 0.02^{\#}$                    |
| D      | $0.78 \pm 0.02$                         | $0.09 \pm 0.01$                         | $0.25 \pm 0.01$                         |
| DK     | $0.05 \pm 0.01^{\blacktriangle\square}$ | $0.28 \pm 0.03^{\blacktriangle\square}$ | $0.46 \pm 0.02^{\blacktriangle\square}$ |

Compared with group D3,  $^{\#}P < 0.05$ ; Compared with group D7,  $^{\blacktriangle}P < 0.05$ ; Compared with group F7,  $^{\square}P < 0.05$ .

Data were shown as mean value  $\pm$  SD, Tukey's multiple comparison test used to compare differences between the groups.

**Table S2:** Expression of nNOS, CAPON and Dexas1 mRNA in prefrontal cortex of rats in each group ( $n = 12$ )

| Groups | nNOS mRNA                            | CAPON mRNA                           | Dexas1 mRNA                          |
|--------|--------------------------------------|--------------------------------------|--------------------------------------|
| C      | $0.0013 \pm 0.0003$                  | $0.0031 \pm 0.0004$                  | $0.0030 \pm 0.0008$                  |
| CK     | $0.0016 \pm 0.0004$                  | $0.0033 \pm 0.0005$                  | $0.0028 \pm 0.0004$                  |
| D      | $0.0061 \pm 0.0006^{\#}$             | $0.0010 \pm 0.0006^{\#}$             | $0.0015 \pm 0.0005^{\#}$             |
| DK     | $0.0031 \pm 0.0007^{\blacktriangle}$ | $0.0019 \pm 0.0007^{\blacktriangle}$ | $0.0022 \pm 0.0006^{\blacktriangle}$ |

Compared with group C,  $^{\#}P < 0.05$ ; Compared with group D,  $^{\blacktriangle}P < 0.05$ .

Data were shown as mean value  $\pm$  SD, Tukey's multiple comparison test used to compare differences between the groups.
